# Supplementary material for: Effect of sheathing the sample aerosol with hydrogen, nitrogen or water vapour on the analytical performance of solid sampling electrothermal vaporisation coupled to inductively coupled plasma optical emission spectrometry
Source: Royal Society of Chemistry journal article supplement (doi:10.1039/c8ja00266e), 2018-10-22
Supplement: c8ja00266e1.pdf [file c8ja00266e1.pdf]

**Table S1** Slope and intercept of each SS-ETV-ICPOES calibration curve obtained with increasing amounts of Montana soil SRM 2710, using Ar 763.511 nm for internal standardization, with and without sheathing gas or water vapour.

| Analyte, nm   | No sheath                 |             | H <sub>2</sub> sheath     |              | N <sub>2</sub> sheath     |              | Water vapour sheath       |              |
|---------------|---------------------------|-------------|---------------------------|--------------|---------------------------|--------------|---------------------------|--------------|
|               | Slope (µg <sup>-1</sup> ) | Intercept   | Slope (µg <sup>-1</sup> ) | Intercept    | Slope (µg <sup>-1</sup> ) | Intercept    | Slope (µg <sup>-1</sup> ) | Intercept    |
| Al II 167.078 | 0.041 ± 0.003             | 0.9 ± 0.5   | 0.10 ± 0.02               | 2.2 ± 3.6    | 0.10 ± 0.01               | 0.9 ± 0.9    | 0.10 ± 0.01               | 0.3 ± 2.3    |
| Al I 176.641  | 0.89 ± 0.03               | -8.3 ± 5.6  | 1.02 ± 0.07               | -14 ± 14     | 2.0 ± 0.1                 | -42 ± 28     | 1.87 ± 0.05               | -12 ± 10     |
| Cd II 226.502 | 96 ± 3                    | -0.1 ± 0.2  | 164 ± 13                  | -0.2 ± 0.9   | 319 ± 20                  | -1.9 ± 1.3   | 222 ± 21                  | -1.5 ± 1.4   |
| Cd I 228.802  | 242 ± 10                  | -1.1 ± 0.7  | 303 ± 34                  | -2.0 ± 2.3   | 670 ± 69                  | -4.4 ± 4.5   | 607 ± 72                  | -7.2 ± 5.0   |
| Co II 228.616 | 59 ± 4                    | 0.03 ± 0.13 | 102 ± 7                   | -0.08 ± 0.22 | 186 ± 12                  | -0.47 ± 0.36 | 139 ± 7                   | -0.2 ± 0.2   |
| Cr II 205.618 | 49 ± 4                    | -0.3 ± 0.5  | 78 ± 18                   | -1.3 ± 2.1   | 176 ± 14                  | -2.9 ± 1.6   | 80 ± 11                   | 0.5 ± 1.3    |
| Cu II 224.700 | 23.0 ± 0.5                | -7.9 ± 4.2  | 17 ± 4                    | 19 ± 34      | 28 ± 1                    | 0 ± 11       | 27 ± 1                    | -15 ± 9      |
| Mn I 403.076  | 22 ± 2                    | -63 ± 44    | 20 ± 4                    | -80 ± 110    | 66 ± 7                    | -330 ± 210   | 40 ± 2                    | -71 ± 50     |
| Mo II 202.095 | 100 ± 11                  | -0.8 ± 0.6  | 140 ± 53                  | -1.4 ± 3.1   | 411 ± 38                  | -3.8 ± 2.2   | 137 ± 47                  | 0.5 ± 2.8    |
| Ni II 174.828 | 28 ± 3                    | -0.2 ± 0.1  | 40 ± 13                   | -0.4 ± 0.5   | 102 ± 11                  | -0.8 ± 0.5   | 58 ± 8                    | -0.07 ± 0.37 |
| P I 178.287   | 10 ± 1                    | -3.9 ± 3.3  | 13 ± 1                    | -5.4 ± 4.7   | 25 ± 3                    | -16 ± 10     | 18 ± 2                    | -8.5 ± 6.8   |
| V II 292.402  | 16 ± 4                    | 1.0 ± 0.9   | 28 ± 8                    | 0.8 ± 1.9    | 39 ± 5                    | 0.5 ± 1.1    | 47 ± 5                    | -0.2 ± 1.3   |
| Zn II 206.200 | 15 ± 1                    | 4 ± 22      | 14 ± 1                    | 0.4 ± 22.5   | 47 ± 5                    | -150 ± 100   | 26 ± 4                    | 28 ± 80      |

**Table S2** Detection limits (3σ, n = 10) in mg kg<sup>-1</sup> by SS-ETV-ICPOES based on 3-mg sample aliquots

| Analyte, nm   | No sheath | H <sub>2</sub> sheath | N <sub>2</sub> sheath | Water vapour sheath |
|---------------|-----------|-----------------------|-----------------------|---------------------|
| Al II 167.078 | 200       | 40                    | 60                    | 40                  |
| Al I 176.641  | 5         | 10                    | 2                     | 3                   |
| Cd II 226.502 | 0.07      | 0.02                  | 0.007                 | 0.02                |
| Cd I 228.802  | 0.03      | 0.01                  | 0.01                  | 0.01                |
| Co II 228.616 | 0.1       | 0.06                  | 0.03                  | 0.04                |
| Cr II 205.618 | 0.4       | 0.1                   | 0.03                  | 0.06                |
| Cu II 224.700 | 0.4       | 0.4                   | 0.2                   | 0.2                 |
| Mn I 403.076  | 0.4       | 0.3                   | 0.09                  | 0.1                 |
| Mo II 202.095 | 0.05      | 0.04                  | 0.01                  | 0.02                |
| Ni II 174.828 | 0.2       | 0.2                   | 0.05                  | 0.1                 |
| P I 178.287   | 0.5       | 0.4                   | 0.1                   | 0.2                 |
| V II 292.402  | 0.4       | 0.2                   | 0.1                   | 0.08                |
| Zn II 206.200 | 0.5       | 0.3                   | 0.1                   | 0.2                 |

**Table S3** Average background emission signals in counts per second (± standard deviation, n = 10) for SS-ETV-ICPOES with and without sheathing gas or water vapour.

| Analyte, nm   | No sheath   | H <sub>2</sub> sheath | N <sub>2</sub> sheath | Water vapour sheath |
|---------------|-------------|-----------------------|-----------------------|---------------------|
| Al II 167.078 | 830 ± 270   | 1710 ± 110            | 840 ± 160             | 660 ± 110           |
| Al I 176.641  | 1380 ± 140  | 4493 ± 340            | 2140 ± 130            | 740 ± 150           |
| Cd II 226.502 | 4440 ± 180  | 13600 ± 110           | 6187 ± 64             | 2880 ± 120          |
| Cd I 228.802  | 7300 ± 170  | 21590 ± 120           | 9890 ± 190            | 4610 ± 190          |
| Co II 228.616 | 7600 ± 170  | 21900 ± 200           | 10250 ± 190           | 5070 ± 160          |
| Cr II 205.618 | 3050 ± 880  | 5600 ± 210            | 3090 ± 130            | 1780 ± 140          |
| Cu II 224.700 | 3990 ± 240  | 11430 ± 180           | 5290 ± 130            | 3400 ± 170          |
| Mn I 403.076  | 40000 ± 280 | 129550 ± 200          | 52360 ± 180           | 35620 ± 180         |
| Mo II 202.095 | 3350 ± 140  | 7970 ± 190            | 4410 ± 130            | 2220 ± 110          |
| Ni II 174.828 | 3950 ± 170  | 5800 ± 180            | 5210 ± 150            | 2980 ± 190          |
| P I 178.287   | 2060 ± 160  | 3900 ± 160            | 2000 ± 96             | 870 ± 150           |
| V II 292.402  | 4910 ± 170  | 16620 ± 140           | 6800 ± 140            | 3800 ± 110          |
| Zn II 206.200 | 3150 ± 240  | 9350 ± 140            | 4420 ± 190            | 1580 ± 160          |
